# Supplementary material for: Antibacterial properties of Cu–ZrO2thin films prepared via aerosol assisted chemical vapour deposition
Source: Royal Society of Chemistry journal article supplement (doi:10.1039/c5tb02312b), 2015-12-17
Supplement: c5tb02312b1.pdf [file c5tb02312b1.pdf]

### Supporting Information

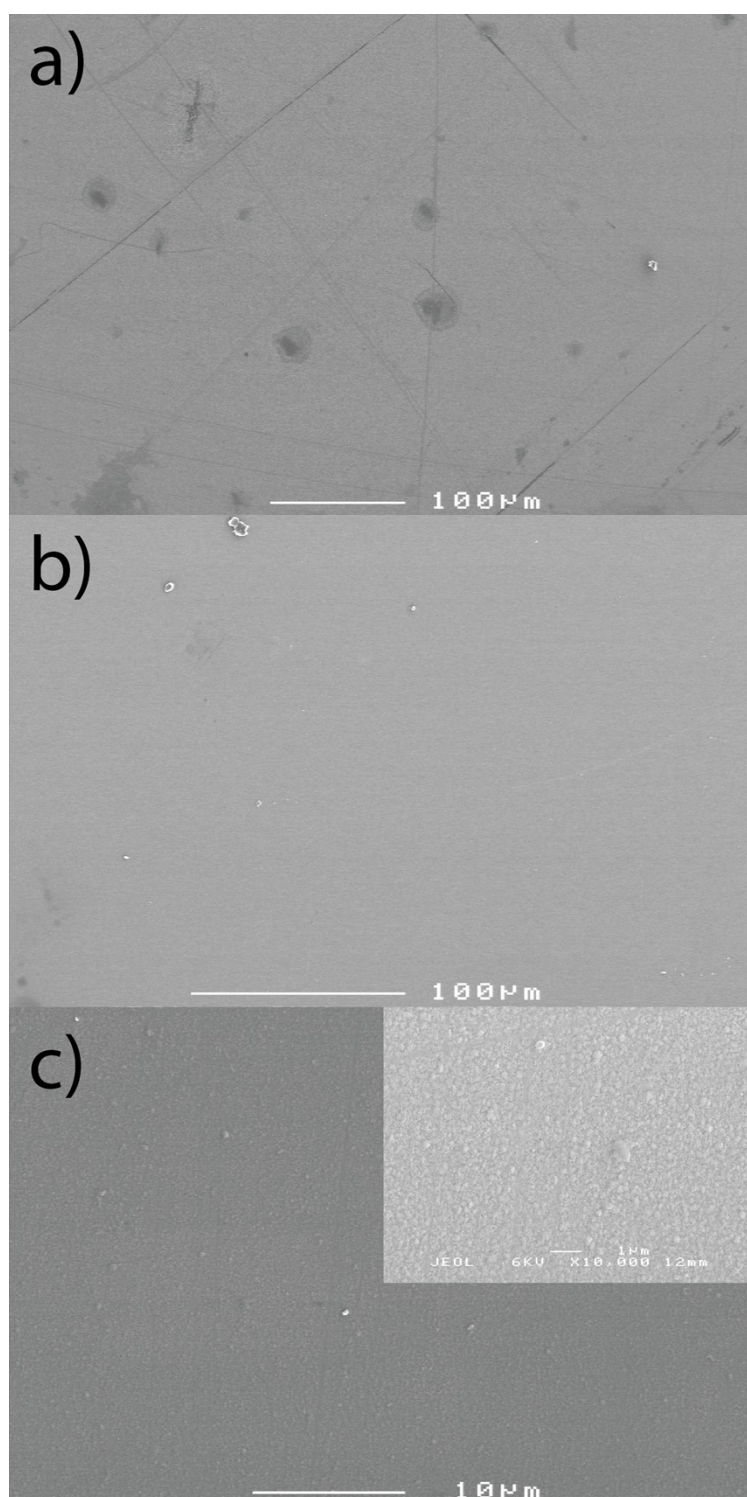

**Figure 1:** SEMs of the a) Cu, b) ZrO<sub>2</sub> and c) Cu-ZrO<sub>2</sub> (magnified image inset) films after light abrasion test using a metal spatula. The Cu film was readily scratched by whereas the ZrO<sub>2</sub> and the composite Cu-ZrO<sub>2</sub> were more resistant to damage. The low magnification SEM images also the films free of cracks and pinholes.

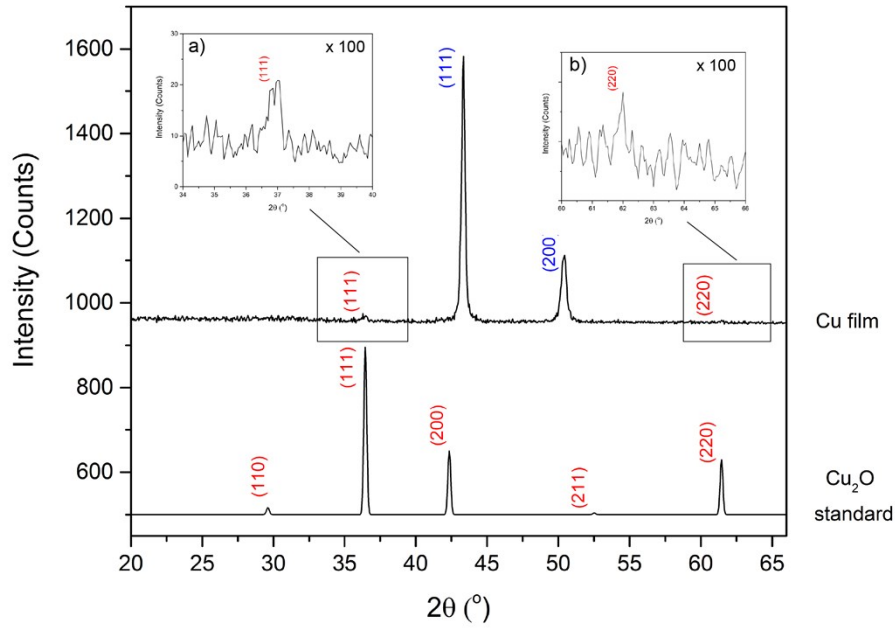

Figure 1 (SI): The XRD pattern for the Cu film grown *via* AACVD. When the 34-40° and 60-65° 2θ regions are magnified peaks matching to the (111) and (220) reflections of Cu<sub>2</sub>O (standard pattern also shown) are evident. Note (hkl) values in red are for Cu<sub>2</sub>O and blue for Cu metal.

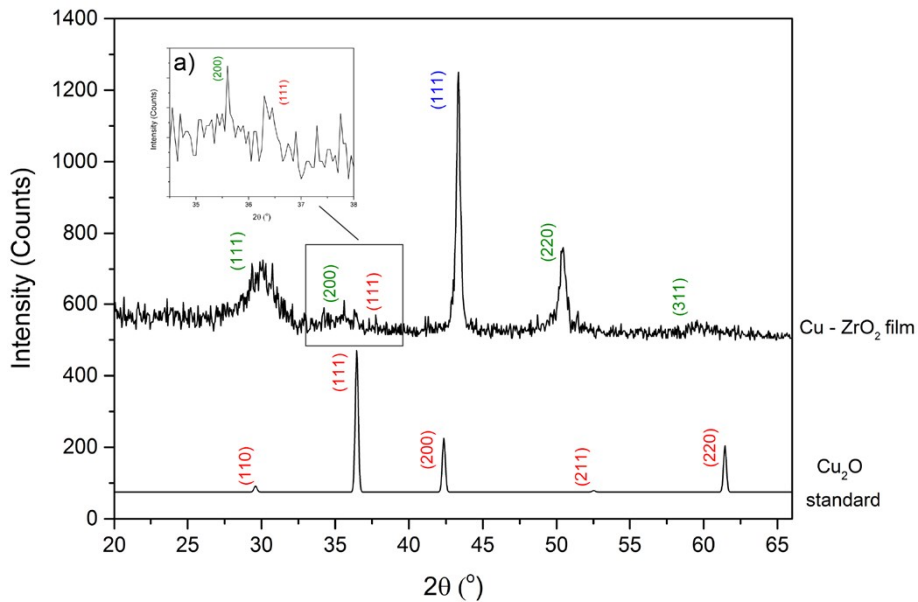

Figure 2 (SI): The XRD pattern for the Cu – ZrO<sub>2</sub> film grown *via* AACVD. When the 34-40° 2θ region magnified peaks matching to the (111) Cu<sub>2</sub>O (standard pattern also shown) is evident. Note (hkl) values in red are for Cu<sub>2</sub>O, green for ZrO<sub>2</sub> and blue for Cu metal.

Table 1: Estimated crystallite size calculated from XRD data using the Debye – Scherrer formula.

|                         | hkl                     | Bragg Angle<br>2θ/° | θB/rad | cos(θB) | βcos(θB) | Diameter/nm |
|-------------------------|-------------------------|---------------------|--------|---------|----------|-------------|
| Cu                      | 111                     | 43.3                | 0.3782 | 0.9293  | 0.0051   | 27          |
|                         | 200                     | 50.4                | 0.4397 | 0.9049  | 0.0069   | 20          |
| ZrO <sub>2</sub>        | 111                     | 30.4                | 0.2649 | 0.9651  | 0.0169   | 8           |
|                         | 200                     | 35.2                | 0.3068 | 0.9533  | 0.0142   | 10          |
|                         | 220                     | 50.6                | 0.4413 | 0.9042  | 0.0236   | 6           |
| Cu-<br>ZrO <sub>2</sub> | 111 (ZrO <sub>2</sub> ) | 30.0                | 0.2614 | 0.9660  | 0.0348   | 4           |
|                         | 111 (Cu)                | 43.3                | 0.3782 | 0.9293  | 0.0057   | 24          |
|                         | 220 (ZrO <sub>2</sub> ) | 50.4                | 0.4399 | 0.9048  | 0.0092   | 15          |

**Table 2: XPS elemental analysis showing peak area and corrected peak area for a) Cu (0) / Cu (I) 2p b) Cu (II) 2p and Zr (IV) 2p. c) Shows the Cu to Zr and Cu (0) / Cu(I) to Cu (II) ratios.**

a)

|                        | Cu (0) / Cu (I) |
|------------------------|-----------------|
| 2p <sub>3/2</sub> area | 237752          |
| 2p <sub>1/2</sub> area | 118876          |
| 2p area                | 356627          |
| R.S.F                  | 6.3             |
| Corrected 2p area      | 56608           |

b)

|                              | Cu (II) |
|------------------------------|---------|
| 2p <sub>3/2</sub> area       | 39658   |
| 2p <sub>1/2</sub> area       | 19829   |
| 2p area                      | 59488   |
| Shake-up satellite peak area | 13398   |
| R.S.F                        | 6.3     |
| Corrected area               | 11569   |

c)

|                        | Zr (IV) |
|------------------------|---------|
| 3d <sub>5/2</sub> area | 38108   |
| 3d <sub>3/2</sub> area | 25418   |
| 3d area                | 63526   |
| R.S.F                  | 2.1     |
| Corrected 2p area      | 30250   |

d)

|                         |     |
|-------------------------|-----|
| Cu : Zr                 | 2.3 |
| Cu (0)/Cu (I) : Cu (II) | 4.9 |

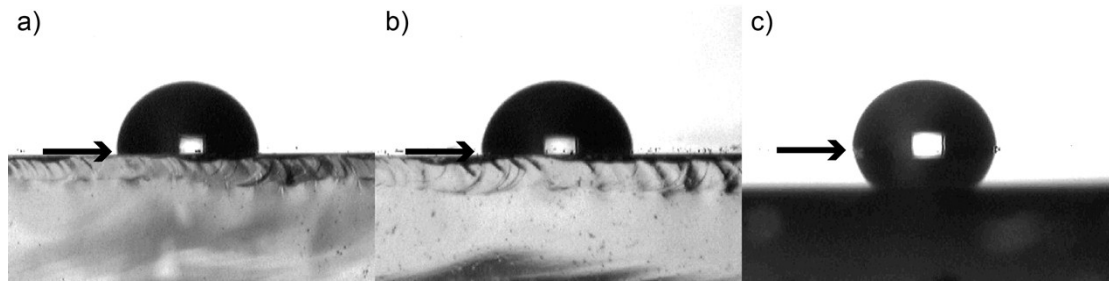

**Figure 3 (SI):** The water contact angle on the surface of a) Cu, b)  $ZrO_2$  and c) Cu -  $ZrO_2$  films grown *via* AACVD at 430 °C. The arrows show the contact line.

Wettability studies on the films determined *via* water contact angle measurements show that the contact angle is similar (ca. 95°) for all the AACVD prepared films. Thus eliminating the contact between the bacteria solution and the film as a variable.
